# Supplementary material for: Synthesis of silver nanoparticles via electrochemical reduction on compact zeolite film modified electrodesElectronic supplementary information (ESI) available: Fig. S1: TEM images of silver nanoparticles prepared from CZFMEs-FAU with different silver exchange degree. Fig. S2: Electron dispersive spectrum analyses of CZFMEs-FAU with different silver exchange degree and electron diffraction analysis of silver nanoparticles with an intermediate size. See http://www.rsc.org/suppdata/cc/b2/b208222e/
Source: Royal Society of Chemistry journal article supplement (doi:10.1039/b208222e), 2002-10-25
Supplement: b208222e.doc [file b208222e.doc]

Electronic supplementary information of the paper entitled “ **Synthesis of silver nanoparticles via electrochemical reduction on compact zeolite film modified electrodes”** (Paper No. B208222E)


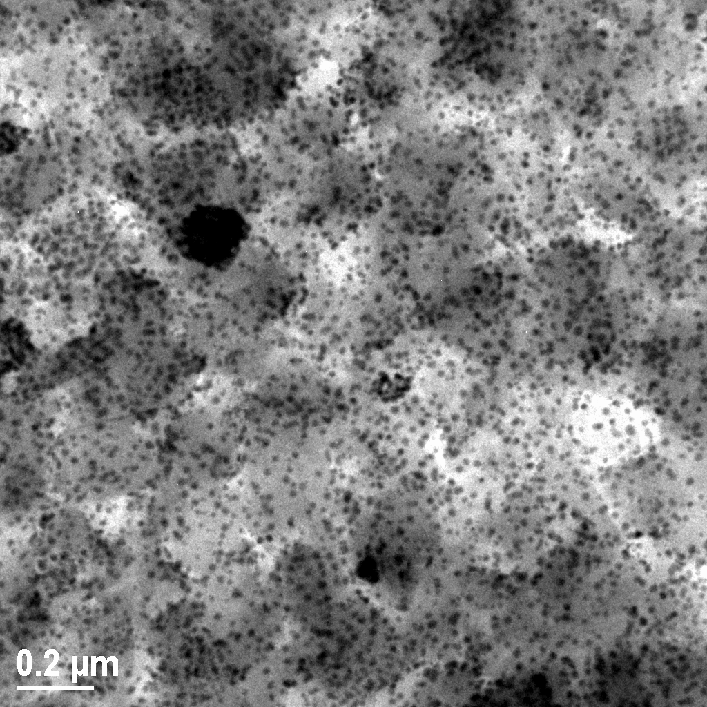


(a)


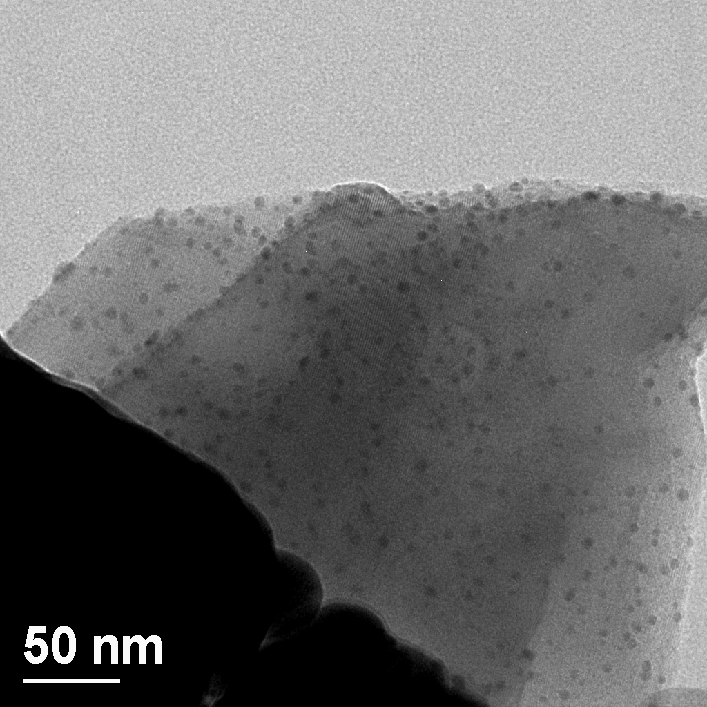


(b)


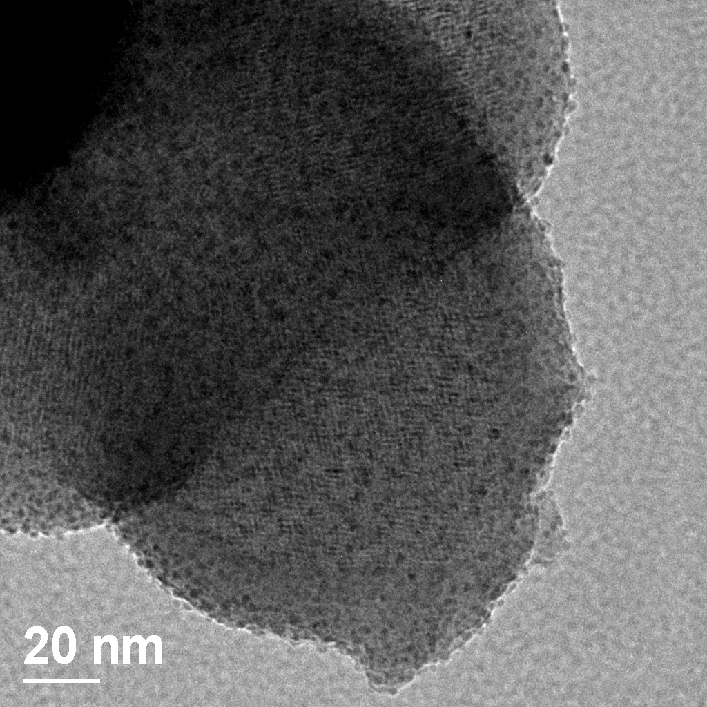


(d)


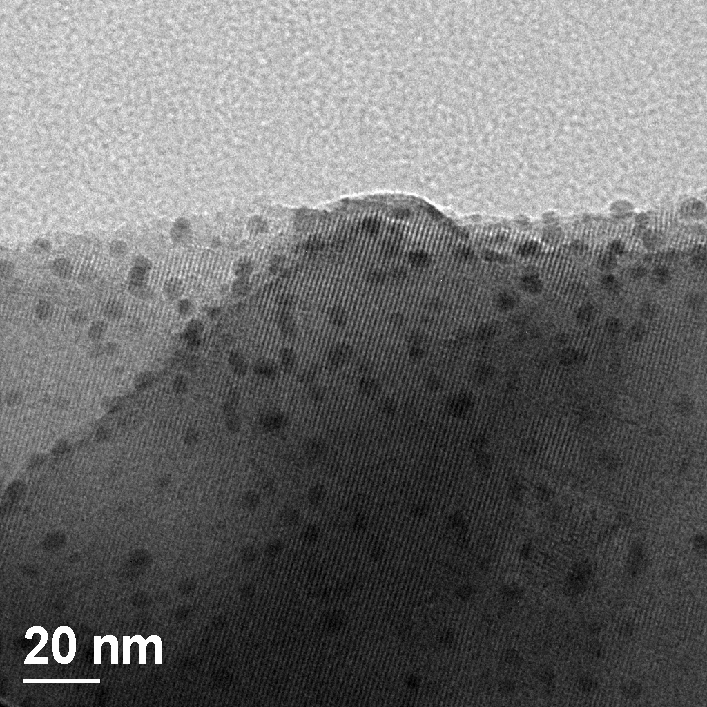


(c)

**Fig. S1** TEM images of sample 1 (a), sample 2 (b, c) and sample 3 (d). The images indicated that the size of silver nanoparticles could be well controlled by changing the silver ion exchange degree of the samples.

(a)

(b)

(c)


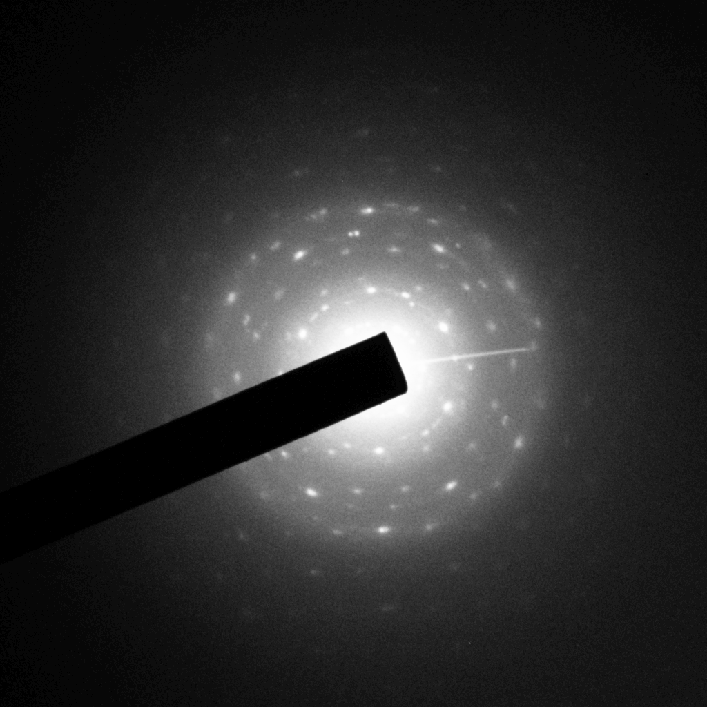


**Fig. S2** Electron dispersive spectrum (EDS) analyses of sample 1 (a), sample 2 (b) and sample 3 (c) before electrochemical reduction, and electron diffraction (ED) analysis of sample 2 (probably containing some diffraction of zeolite-FAU). The EDS results indicate that these samples possess different ion exchange degree from the Ag/Al and Na/Al ratios, as shown in table 1, and ED analysis indicates that the silver nanoparticles might be polycrystals.
